# Supplementary material
Source: MDPI journal article supplement (https://www.mdpi.com/1999-4907/15/5/738)
Supplement: s1 [file s1]

**Table S1**, Fig. 3 (A) The annual total difference in tree carbon stock density of each plot ( $\text{t ha}^{-1}$ ). (B) The annual total difference in tree volume of each plot ( $\text{m}^3$ ).

| Thinning intensity (%) | Number of trees (n) | Annual total difference tree carbon (%) | Annual total difference tree volume ( $\text{m}^3$ ) |
|------------------------|---------------------|-----------------------------------------|------------------------------------------------------|
| 0                      | 73                  | 9.28                                    | 36.93                                                |
| 10                     | 53                  | 9.50                                    | 38.10                                                |
| 11                     | 59                  | 10.28                                   | 40.52                                                |
| 16                     | 50                  | 10.37                                   | 42.40                                                |
| 18                     | 55                  | 11.13                                   | 44.99                                                |
| 22                     | 50                  | 7.99                                    | 32.96                                                |

**Table S2**, Fig. 4 (A, B) Average annual growth rate of DBH and height of trees in each plot. The data in the table are “mean  $\pm$  SE”.

| Thinning intensity<br>(%) | Number of trees<br>(n) | Growth rate of DBH<br>(%) | Growth rate of height<br>(%) |
|---------------------------|------------------------|---------------------------|------------------------------|
| 0                         | 73                     | 1.96 $\pm$ 0.12           | 6.28 $\pm$ 0.4               |
| 10                        | 53                     | 2.27 $\pm$ 0.13           | 7.46 $\pm$ 0.5               |
| 11                        | 59                     | 2.47 $\pm$ 0.14           | 9.17 $\pm$ 0.5               |
| 16                        | 50                     | 2.54 $\pm$ 0.13           | 9.32 $\pm$ 0.4               |
| 18                        | 55                     | 2.57 $\pm$ 0.14           | 9.70 $\pm$ 0.4               |
| 22                        | 50                     | 2.55 $\pm$ 0.1            | 5.56 $\pm$ 0.4               |

**Table S3**, Fig. 5(A) Average carbon content (g/kg) in soil of different layers under different thinning intensity. The data in the table are “mean  $\pm$  SD”. Average carbon stock in three soil layers of each plot. Different letters next to numbers indicate significant differences ( $p < 0.001$ , Tukey’s HSD test) among the same soil layer with different thinning intensities.

| Thinning (%) | 0 – 20 cm                       | 20 – 40 cm                     | 40 – 60 cm                    |
|--------------|---------------------------------|--------------------------------|-------------------------------|
| 0            | 22.68 $\pm$ 1.55 <sup>abc</sup> | 8.68 $\pm$ 0.66 <sup>dc</sup>  | 4.54 $\pm$ 0.75 <sup>f</sup>  |
| 10           | 21.30 $\pm$ 2.04 <sup>bc</sup>  | 11.65 $\pm$ 1.15 <sup>d</sup>  | 8.70 $\pm$ 0.39 <sup>de</sup> |
| 11           | 24.96 $\pm$ 2.41 <sup>ab</sup>  | 7.00 $\pm$ 0.37 <sup>ef</sup>  | 7.16 $\pm$ 1.58 <sup>ef</sup> |
| 16           | 19.49 $\pm$ 0.86 <sup>c</sup>   | 8.19 $\pm$ 0.61 <sup>def</sup> | 5.27 $\pm$ 0.63 <sup>ef</sup> |
| 18           | 19.49 $\pm$ 2.73 <sup>c</sup>   | 8.15 $\pm$ 1.55 <sup>def</sup> | 6.22 $\pm$ 1.29 <sup>ef</sup> |
| 22           | 26.73 $\pm$ 5.01 <sup>a</sup>   | 8.29 $\pm$ 0.80 <sup>def</sup> | 5.08 $\pm$ 0.60 <sup>ef</sup> |

**Table S4**, Fig. 5(B) Average bulk density (g/cm<sup>3</sup>) in soil of different layers under different thinning intensity. The data in the table are “mean  $\pm$  SD”. Different letters next to numbers indicate significant differences at the ( $p < 0.001$ , Tukey’s HSD test) level among the average bulk density in soil with different thinning intensities.

| Thinning (%) | 0 – 20 cm                      | 20 – 40 cm                     | 40 – 60 cm                    |
|--------------|--------------------------------|--------------------------------|-------------------------------|
| 0            | 1.20 $\pm$ 0.12 <sup>abc</sup> | 1.44 $\pm$ 0.19 <sup>ab</sup>  | 1.43 $\pm$ 0.15 <sup>ab</sup> |
| 10           | 1.01 $\pm$ 0.07 <sup>c</sup>   | 1.30 $\pm$ 0.15 <sup>abc</sup> | 1.33 $\pm$ 0.07 <sup>ab</sup> |
| 11           | 1.21 $\pm$ 0.12 <sup>abc</sup> | 1.38 $\pm$ 0.06 <sup>ab</sup>  | 1.48 $\pm$ 0.18 <sup>ab</sup> |
| 16           | 1.15 $\pm$ 0.12 <sup>abc</sup> | 1.27 $\pm$ 0.14 <sup>abc</sup> | 1.40 $\pm$ 0.10 <sup>ab</sup> |
| 18           | 1.18 $\pm$ 0.11 <sup>bc</sup>  | 1.48 $\pm$ 0.07 <sup>ab</sup>  | 1.50 $\pm$ 0.20 <sup>a</sup>  |
| 22           | 1.26 $\pm$ 0.19 <sup>abc</sup> | 1.49 $\pm$ 0.07 <sup>a</sup>   | 1.44 $\pm$ 0.13 <sup>ab</sup> |

**Table S5**, Fig. 6 (A) Average carbon content of vegetation (g/kg) of different layers under different thinning intensity. The data in the table are “mean  $\pm$  SE”. Different letters next to numbers indicate significant differences ( $p < 0.001$ , Tukey’s HSD test) among the same vegetation layer with different thinning intensities.

| Thinning (%) | Upper layer                        | Middle layer                      | Lower layer                       |
|--------------|------------------------------------|-----------------------------------|-----------------------------------|
| 0            | 315.15 $\pm$ 13.6 <sup>cdefg</sup> | 237.77 $\pm$ 11.9 <sup>efg</sup>  | 208.13 $\pm$ 21.1 <sup>g</sup>    |
| 10           | 479.39 $\pm$ 60.7 <sup>ab</sup>    | 392.93 $\pm$ 24.6 <sup>abcd</sup> | 274.99 $\pm$ 7.06 <sup>defg</sup> |
| 11           | 344.02 $\pm$ 15.7 <sup>cdef</sup>  | 263.27 $\pm$ 22.5 <sup>efg</sup>  | 194.92 $\pm$ 17.4 <sup>g</sup>    |
| 16           | 274.72 $\pm$ 29.8 <sup>defg</sup>  | 219.88 $\pm$ 26.3 <sup>fg</sup>   | 216.51 $\pm$ 16.3 <sup>g</sup>    |
| 18           | 365.71 $\pm$ 22.1 <sup>abcde</sup> | 298.00 $\pm$ 28.4 <sup>defg</sup> | 275.45 $\pm$ 35.7 <sup>defg</sup> |
| 22           | 492.93 $\pm$ 23.3 <sup>a</sup>     | 437.00 $\pm$ 18.7 <sup>abc</sup>  | 354.42 $\pm$ 22.0 <sup>bcd</sup>  |

**Table S6**, Fig. 6(B) Average carbon content (g/kg) of shrub under different thinning intensity. The data in the table are “mean  $\pm$  SE”. Different letters next to numbers indicate significant differences level ( $p < 0.001$ , Tukey’s HSD test) among the average carbon of shrubs with different thinning intensities.

| Thinning Intensity (%) | Carbon content (g/kg)           |
|------------------------|---------------------------------|
| 0                      | 259.62 $\pm$ 19.8 <sup>cd</sup> |
| 10                     | 219.67 $\pm$ 11.0 <sup>d</sup>  |
| 11                     | 317.72 $\pm$ 15.8 <sup>bc</sup> |
| 16                     | 301.76 $\pm$ 8.6 <sup>c</sup>   |
| 18                     | 366.42 $\pm$ 17.1 <sup>ab</sup> |
| 22                     | 411.19 $\pm$ 19.2 <sup>a</sup>  |

**Table S7.** Carbon storage of different tree organs with different thinning treatments. The numbers in parentheses are the percentage of the carbon storage of each part in the total carbon storage.

| Date                  | Thinning treatment % | Carbon storage of different organ (t ha <sup>-1</sup> ) |                 |                 |                 | Total (t ha <sup>-1</sup> ) |
|-----------------------|----------------------|---------------------------------------------------------|-----------------|-----------------|-----------------|-----------------------------|
|                       |                      | Stem                                                    | Branch          | Leaf            | Root            |                             |
| After thinning (2019) | 0                    | 86.74<br>(89.11%)                                       | 4.33<br>(4.45%) | 2.20<br>(2.26%) | 4.07<br>(4.18%) | 97.3                        |
|                       | 10                   | 70.47<br>(89.20%)                                       | 3.47<br>(4.49%) | 1.79<br>(2.27%) | 3.27<br>(4.14%) | 79.00                       |
|                       | 11                   | 67.61<br>(88.09%)                                       | 3.49<br>(4.59%) | 1.77<br>(2.32%) | 3.27<br>(4.34%) | 76.14                       |
|                       | 16                   | 67.96<br>(89.39%)                                       | 3.28<br>(4.31%) | 1.72<br>(2.25%) | 3.08<br>(4.04%) | 76.03                       |
|                       | 18                   | 67.48<br>(89.09%)                                       | 3.38<br>(4.46%) | 1.74<br>(2.29%) | 3.16<br>(4.16%) | 75.75                       |
|                       | 22                   | 70.91<br>(89.54%)                                       | 3.35<br>(4.24%) | 1.76<br>(2.22%) | 3.17<br>(4.00%) | 79.19                       |
|                       | 0                    | 120.92<br>(89.93%)                                      | 5.44<br>(4.04%) | 2.78<br>(2.07%) | 5.31<br>(3.95%) | 134.45                      |
|                       | 10                   | 105.53<br>(90.21%)                                      | 4.56<br>(3.89%) | 2.38<br>(2.03%) | 4.52<br>(3.86%) | 116.99                      |
| September 2023        | 11                   | 105.42<br>(89.91%)                                      | 4.73<br>(4.03%) | 2.43<br>(2.07%) | 4.67<br>(3.97%) | 117.25                      |
|                       | 16                   | 106.25<br>(90.42%)                                      | 4.45<br>(3.78%) | 2.37<br>(2.01%) | 4.44<br>(3.78%) | 117.50                      |
|                       | 18                   | 108.55<br>(90.26%)                                      | 4.65<br>(3.87%) | 2.43<br>(2.02%) | 4.63<br>(3.84%) | 120.27                      |
|                       | 22                   | 100.42<br>(90.34%)                                      | 4.25<br>(3.82%) | 2.26<br>(2.03%) | 4.22<br>(3.79%) | 111.16                      |

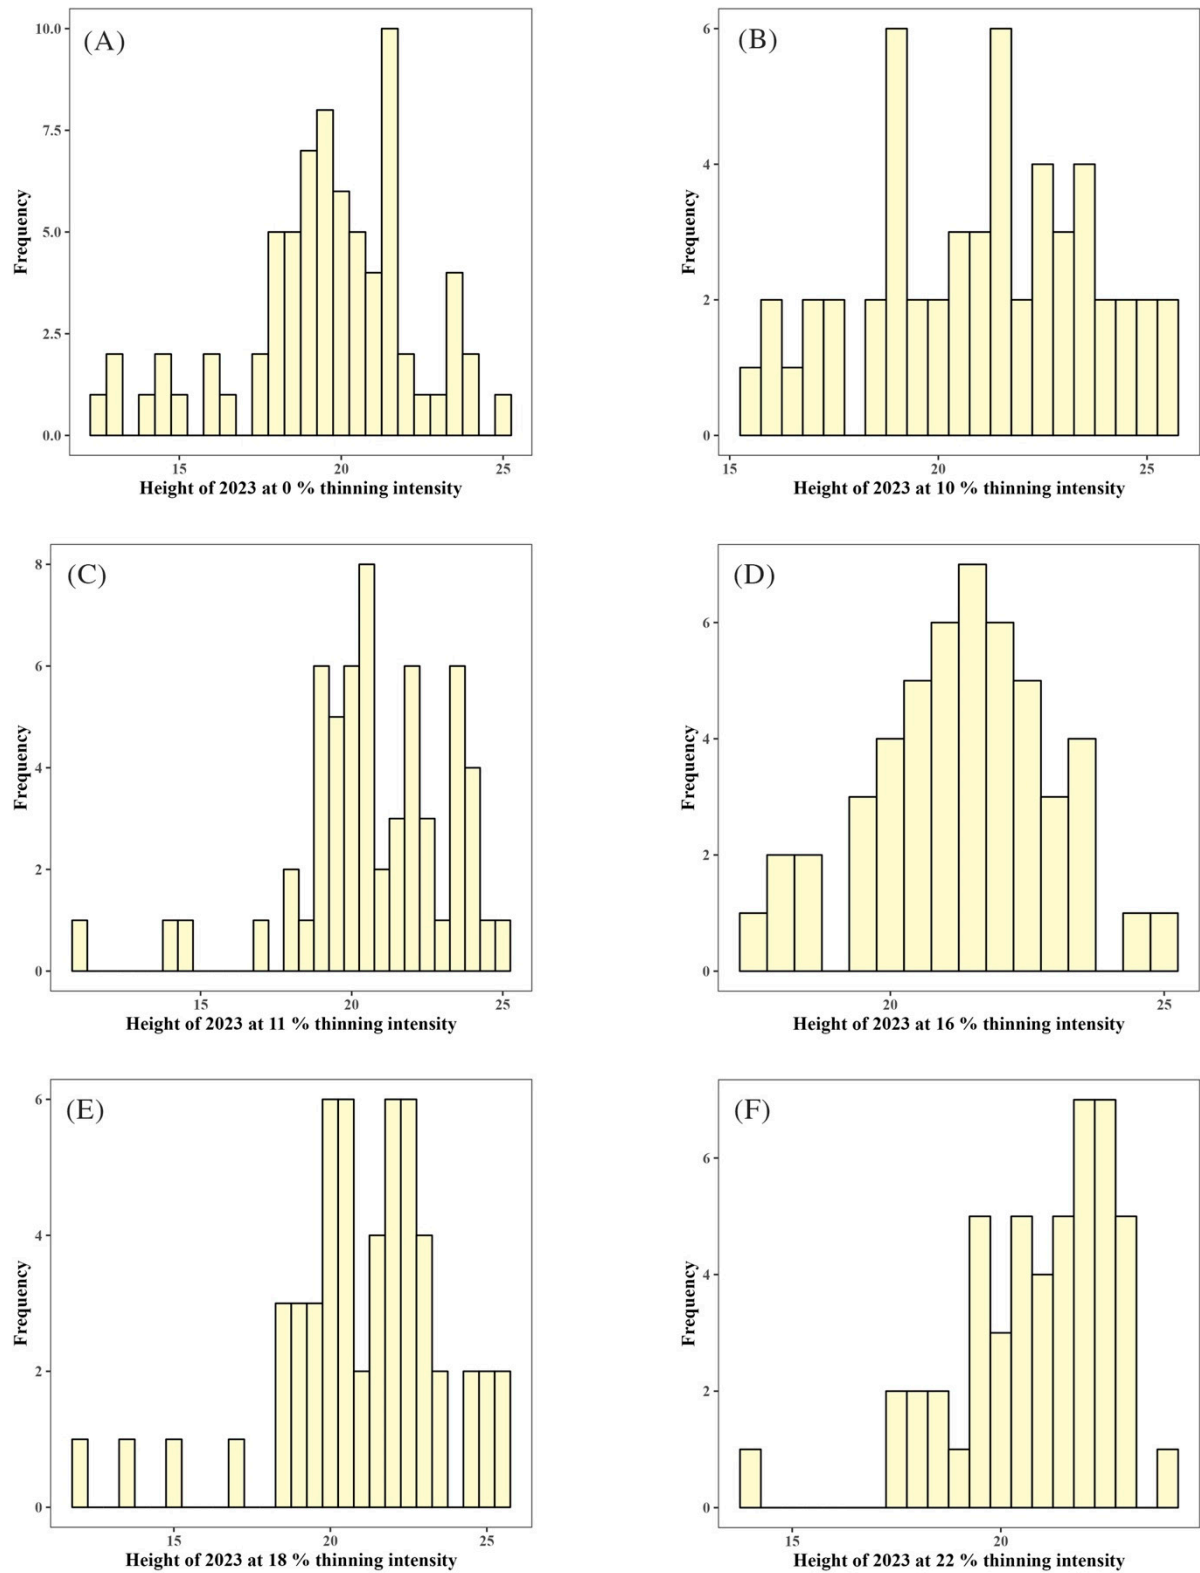

**Figure S1:** Histogram of distribution height of trees in different thinning intensities in 2023. This histogram is constructed to explore whether the data were normally distributed or not.
